1 **GPER-dependent estrogen signaling increases cardiac GCN5L1 expression and**  
2 **MCAD activity**

3

4 Janet R. Manning<sup>1,2,3\*</sup>, Dharendra Thapa<sup>1,2,3,#</sup>, Manling Zhang<sup>1,2,3</sup>, Michael W.  
5 Stoner<sup>1,2,3</sup>, John C. Sembrat<sup>4</sup>, Mauricio Rojas<sup>5</sup>, and Iain Scott<sup>1,2,3\*</sup>

6

7 <sup>1</sup>Division of Cardiology, Department of Medicine, University of Pittsburgh, Pittsburgh,  
8 PA. <sup>2</sup>Vascular Medicine Institute, Department of Medicine, University of Pittsburgh,  
9 Pittsburgh, PA. <sup>3</sup>Center for Metabolism and Mitochondrial Medicine, Department of  
10 Medicine, University of Pittsburgh, Pittsburgh, PA. <sup>4</sup>Division of Pulmonary, Allergy, and  
11 Critical Care Medicine, Department of Medicine, University of Pittsburgh, Pittsburgh,  
12 PA. <sup>5</sup>Division of Pulmonary, Critical Care and Sleep Medicine, Department of Medicine,  
13 The Ohio State University, Columbus, OH. <sup>#</sup>Current address: Department of Exercise  
14 Physiology, West Virginia University

15 **\*To whom correspondence should be addressed:**

16 Iain Scott, PhD, FAHA, FCVS

Janet Manning, PhD

17 Department of Medicine

Department of Medicine

18 University of Pittsburgh

University of Pittsburgh

19 BST E1259

BST E1200

20 200 Lothrop Street

200 Lothrop Street

21 Pittsburgh, PA 15261

Pittsburgh, PA 15261

22 Email: [iain.scott@pitt.edu](mailto:iain.scott@pitt.edu)

Email: [manningj@pitt.edu](mailto:manningj@pitt.edu)

23 Tel: (412) 648-7691

Tel: (412) 648-8018

24 **ABSTRACT**

25

26 Reversible lysine acetylation regulates the activity of cardiac metabolic enzymes,  
27 including those controlling fuel substrate metabolism. Mitochondrial-targeted GCN5L1  
28 and SIRT3 have been shown to regulate the acetylation status of mitochondrial  
29 enzymes, which results in alterations to the relative oxidation rates of fatty acids,  
30 glucose, and other fuels for contractile activity. However, the role that lysine acetylation  
31 plays in driving metabolic differences between male and female hearts is not currently  
32 known. In this study, we report that estrogens induce the expression of GCN5L1 via  
33 GPER agonism in cardiac cells, which increases the enzymatic activity and acetylation  
34 status of the fatty acid oxidation enzyme medium chain acyl-CoA dehydrogenase  
35 (MCAD).

36 **INTRODUCTION**

37

38 Improved understanding of the physiological and metabolic differences between men  
39 and women may allow us to develop new therapies that can address sex-based  
40 disparities in cardiac disease treatment outcomes. Sex hormones testosterone and  
41 estrogen, as well as chromosomal effects, may contribute to sex-based differences.  
42 Pre-menopausal women exhibit increased estrogen levels relative to men and post-  
43 menopausal women, which results in greater activation of estrogen receptors in the  
44 myocardium. These are comprised of the canonical estrogen receptors alpha and beta  
45 (ER $\alpha$  and ER $\beta$ ), and the G-protein coupled estrogen receptor (GPER, or GPR30).<sup>1</sup>  
46 Canonical ERs are targeted directly to the nucleus, and interact with ER responsive  
47 elements (EREs) within the genome to regulate transcription, while GPER activation  
48 results in a cascade of posttranslational modifications in the cell that may also ultimately  
49 drive genomic responses.<sup>2-4</sup>

50

51 Estrogen receptor activation has been associated with changes in the abundance and  
52 activity of numerous enzymes involved in glucose and fatty acid energy metabolism,  
53 which result in significant sexual dimorphism in cardiac metabolic profiles. Of particular  
54 note, women exhibit greater cardiac fatty acid uptake and oxidation relative to men  
55 under both normal and pathophysiological conditions.<sup>5</sup> Estrogen modulates the  
56 expression of cardiac metabolic proteins, and upregulates proteins that impact fatty acid  
57 metabolism, including PGC-1 $\alpha$  and acyl-CoA dehydrogenases (ACADs).<sup>6-8</sup>

58 Consequently, the presence of estrogen has a significant impact on fuel substrate  
59 utilization in the heart.

60

61 The posttranslational acetylation of non-nuclear targets has emerged as a critical  
62 regulator of metabolic activity in the heart. In mitochondria, GCN5L1 and SIRT3 have  
63 been reported to increase and decrease, respectively, the acetylation status of enzymes  
64 that metabolize fatty acids and glucose.<sup>9-15</sup> However, sex differences in the acetylation  
65 of metabolic proteins in cardiac mitochondria have not been investigated. We  
66 hypothesized that differences in the expression of GCN5L1 and SIRT3 between men  
67 and women may change the acetylation status and activity of enzymes involved in  
68 glucose and fatty acid metabolism, and that estrogen signaling may drive this process.

69

70 The studies presented here demonstrate that mitochondrial protein acetylation is  
71 increased in female mice relative to males, which is associated with sex-dependent  
72 elevations in GCN5L1 abundance. In addition, we show that estrogen directly increases  
73 GCN5L1 expression in human-derived cardiac cells, and that GCN5L1 is decreased in  
74 the hearts of postmenopausal women relative to younger women. The primary  
75 mechanism for estrogen-mediated GCN5L1 upregulation is identified as GPER  
76 activation, through a transcription-independent pathway. Finally, we determine that  
77 estrogen-dependent acetylation of MCAD is dependent on GCN5L1, and that loss of  
78 GCN5L1 results in diminished MCAD activity.

## 79 **METHODS**

80

### 81 Human tissues

82 Fresh human cardiac tissue samples were collected from the left ventricles of organ  
83 donors deemed not suitable for transplant, under a protocol approved by the University  
84 of Pittsburgh Committee for Oversight of Research and Clinical Training (CORID).

85 Tissues were flash-frozen and stored at -80 °C until processing. Post menopause:  
86 range = 65-86 years, median = 69 years, N = 7. Pre menopause: range = 22-39 years,  
87 median = 36 years, N = 5.

88

### 89 Animal care and use

90 All housing and experiments in mice were conducted in accordance with the guidelines  
91 established by the National Institutes of Health, and approved by the University of  
92 Pittsburgh Institutional Animal Care and Use Committee. Male and female C57BL/6J  
93 mice (aged 8-10 weeks) were purchased from The Jackson Laboratory, and maintained  
94 on a regular chow diet with a 12 h light/12 h dark light cycle.

95

### 96 Cell culture and drug treatments

97 AC16 cells (a proliferating cell line derived from human cardiomyocytes<sup>16</sup>) were  
98 purchased from Millipore. Stable GCN5L1 knockdown was generated as previously  
99 described.<sup>17</sup> Cells were treated with 10 nM 17 $\beta$ -estradiol (E2), ICI 182, 780 (Fulvestrant;  
100 an ER $\alpha$  and ER $\beta$  antagonist with GPER agonist activity<sup>18-20</sup>), G-1 (a selective GPER

101 agonist), G-36 (a selective GPER antagonist), MG-132 (a 26S protease inhibitor),  
102 and/or cycloheximide (CHX; a translation inhibitor).

103

#### 104 Mitochondrial Isolation

105 Mitochondrial fractions were purified from tissue and cells using the Qproteome  
106 Mitochondrial Isolation Kit (Qiagen) according to the manufacturer's instructions. Briefly,  
107 samples were homogenized in cold Lysis Buffer, and centrifuged at 1000 *g*.  
108 Supernatant containing the cytosolic fraction was discarded, and the pellet was re-  
109 suspended and processed in cold Disruption Buffer by shearing through a 25 *g* needle  
110 and syringe. Samples were centrifuged at 1000 *g*, the supernatant was collected, and  
111 centrifuged again at 6000 *g* to pellet the mitochondrial fraction. The pellet was washed  
112 in Storage Buffer, and then used for subsequent immunoblot or MCAD activity studies  
113 as described below.

114

#### 115 Immunoblotting

116 Tissue, cells, or purified mitochondria were lysed in 1% CHAPS buffer. Protein was  
117 quantitated using a BioDrop  $\mu$ LITE analyzer (BioDrop), and equal amounts were loaded  
118 on a 12% SDS-PAGE gel, before transfer to nitrocellulose membranes. Membranes  
119 were blocked using Odyssey blocking buffer and incubated in primary antibodies  
120 overnight ( $\alpha$ Tubulin, 1:1000, Cell Signaling; SIRT3, 1:1000, Cell Signaling; MCAD  
121 1:1000, Cell Signaling; GCN5L1 1:500, generated as previously described<sup>21</sup>), followed  
122 by incubation at room temperature with fluorescent secondary antibodies for 1 h (800

123 nm anti-rabbit, LiCor). Bands were visualized using an Odyssey Imager, and quantitated  
124 using Image Studio Lite v 5.2 (LiCor).

125

#### 126 Quantitative RT-PCR

127 RNA was isolated from tissue or cells using RNEasy kit (Qiagen). RNA was quantified  
128 and 500 ng-1000 ng was used to generate cDNA using Maxima Reverse Transcriptase  
129 (Thermo Fisher). Quantitative PCR was performed using SYBR-Green (Thermofisher)  
130 and primers for GCN5L1 or SIRT3. GAPDH or PPIA were used for normalization.

131

#### 132 MCAD activity assays

133 MCAD activity was assessed using a DCPIP/PES-based assay as previously described.  
134 Briefly, DCPIP (50  $\mu$ M), PES (2 mM), NEM (0.2 mM), KCN (0.4 mM), Triton X-100  
135 (0.10%), and lysate were added to ice cold potassium phosphate buffer (0.1 M). MCAD  
136 substrate octanoyl-CoA was added to a final concentration of 40  $\mu$ M, and then warmed  
137 to 37 °C for 5 min. Absorbance was read at 600 nm, and then normalized to protein  
138 concentration.

139

#### 140 Statistical Analysis

141 Statistical analyses were performed using GraphPad Prism 8.3. Student's t-tests were  
142 used for simple comparisons between groups. One-way Analyses of Variance (ANOVA)  
143 was used to compare more than two groups, followed by post-hoc Student's t-tests. For  
144 studies examining multiple time-points a two-way ANOVA was used with post-hoc

145 Sidak's multiple comparisons tests. A  $P$  value  $<0.05$  was regarded as significant. All  
146 data are represented as the mean  $\pm$  SEM.

147

## 148 **RESULTS**

149

### 150 **Mitochondrial acetylation and GCN5L1 expression is increased in the hearts of** 151 **female mice compared to male mice**

152

153 To determine whether mitochondrial protein acetylation status is different between  
154 sexes, we isolated mitochondria from the hearts of male and female C57BL/6J mice,  
155 and immunoblotted for acetylated lysine residues. We observed a modest but significant  
156 increase in the intensity of bands in female mice compared to male mice (**Figure 1A**).

157 We next examined whether the increase in mitochondrial acetylation is associated with  
158 changes in the expression of proteins that regulate mitochondrial protein acetylation. No  
159 changes were observed in the expression of the mitochondrial-targeted deacetylase  
160 SIRT3 (**Figure 1B**). However, a significant increase in both GCN5L1 mRNA and protein  
161 was observed (**Figures 1C and 1D**). Based on these data, we conclude that increased  
162 acetylation in female cardiac mitochondria is driven by increased GCN5L1 abundance.

163

### 164 **Estrogen increases GCN5L1 expression in human cardiomyocytes via GPER**

165

166 To determine if changes in GCN5L1 abundance are present in a clinically relevant  
167 setting, we analyzed heart tissue obtained from female patients of pre- and post-



168 menopausal age. Immunoblotting revealed that cardiac tissues from women after  
169 menopause, when estrogen levels are lower, have a significantly lower GCN5L1 protein  
170 abundance (**Figure 2A**). As estrogen has been reported to mediate several of the sex  
171 differences observed in human myocardial tissue,<sup>4</sup> we next determined whether  
172 estrogen induces GCN5L1 expression directly. Treatment of AC16 cells (derived from  
173 human ventricular cardiomyocytes)<sup>16</sup> with 17- $\beta$  estradiol (E2) resulted in significantly  
174 increased levels of GCN5L1 protein (**Figure 2B**). To determine whether signaling for  
175 increased GCN5L1 expression was through canonical estrogen receptors, we incubated  
176 AC16 cells with ICI 182,780 (Fulvestrant), a potent inhibitor of ER $\alpha$  and ER $\beta$ .  
177 Surprisingly, rather than blocking GCN5L1 induction, ICI 182,780 additively increased  
178 GCN5L1 levels, and produced a robust increase in GCN5L1 even in the absence of E2  
179 (**Figure 2C**). ICI 182,780, in addition to blocking ER $\alpha$  and ER $\beta$ , also has been reported  
180 to act as a partial agonist for the G-protein coupled estrogen receptor (GPER).<sup>19,22,23</sup>  
181 We therefore examined whether GPER played a role in estrogen-mediated GCN5L1  
182 induction using the GPER agonist G-1, and the GPER antagonist G-36. Incubation with  
183 G-1 significantly increased GCN5L1 protein abundance, while G-36 blocked E2-  
184 mediated GCN5L1 expression (**Figure 2D**). From these data, we conclude that  
185 GCN5L1 abundance is increased by estrogen exposure via GPER-mediated signaling.

186

### 187 **Estrogen drives GCN5L1 translation**

188

189 To understand the mechanism of GPER-induced GCN5L1 elevations, we monitored  
190 mRNA levels in AC16 cells after exposure to E2 or G-1 using qPCR. Surprisingly, no

191 change in mRNA was observed at any of the time points measured, suggesting that E2  
192 control of GCN5L1 expression occurs downstream of transcription (**Figure 3A**). To  
193 determine whether GCN5L1 protein elevation was due to an estrogen-induced reduction  
194 in protein degradation, the effects of 26S proteasomal inhibitor MG132 on GCN5L1  
195 expression were evaluated. It was expected that if estrogen signaling elevates GCN5L1  
196 levels by reducing protease activity, a blockade of protease activity would normalize  
197 protein levels in vehicle-treated cells, and the difference observed in E2-treated cells  
198 would disappear. Data showed that this was not the case, and rather MG132 amplified  
199 the increase in protein observed in the presence of E2 or G-1 (**Figure 3B**). We next  
200 examined whether estrogen alters GCN5L1 mRNA translation. To test this hypothesis,  
201 E2 and G-1 treated AC16 cells were incubated with the translational inhibitor  
202 cycloheximide (CHX). CHX treatment effectively normalized GCN5L1 levels, indicating  
203 that differences in protein expression may be attributed to GCN5L1 translational  
204 regulation (**Figure 3C**).

205

### 206 **Estrogen-induced acetylation and activation of MCAD is reduced when GCN5L1** 207 **levels are depleted**

208

209 Cardiac GCN5L1 has been reported to mediate the acetylation and activation of acyl-  
210 CoA dehydrogenases (ACADs), which mediate fatty acid breakdown.<sup>12,24</sup> Among the  
211 ACADs, MCAD has been repeatedly identified as a target regulated by estrogens in the  
212 heart.<sup>6-8</sup> We therefore tested whether GCN5L1 may link estrogen receptor agonism to  
213 increases in MCAD acetylation and activity. Estrogen treatment resulted in increased

214 MCAD activity in AC16 cells, which was blocked in GCN5L1-depleted cells (**Figure 4A**).  
215 When GCN5L1 was silenced, MCAD acetylation was significantly reduced in E2 and G-  
216 1 treated cells, relative to control cells under the same conditions (**Figure 4B**). These  
217 data suggest that E2- and GPER agonist-induced MCAD activation occurs via GCN5L1.  
218

219 **DISCUSSION**

220

221 Here we determined that mitochondrial protein acetylation, and GCN5L1 expression,  
222 are elevated in female mouse hearts compared to male. We find that estrogen  
223 upregulates GCN5L1 via GPER, and pharmacological block of GPER ablates induction.  
224 GCN5L1 is also elevated in pre-menopausal women, where estrogen levels are higher,  
225 compared to post-menopausal women. E2 and G-1 do not alter GCN5L1 gene  
226 transcription or proteasomal degradation; instead translational blockade prevents  
227 GCN5L1 induction. Finally, we determine that the loss of GCN5L1 blocks estrogen-  
228 mediated acetylation and activation of MCAD. These data point to a significant role for  
229 GCN5L1 in estrogen-mediated regulation of cardiac fuel metabolism (summarized in  
230 **Figure 4C**).

231

232 Significant differences in cardiac physiology and pathology between men and women  
233 are well established. Pre-menopausal women are largely protected from cardiovascular  
234 disease (CVD) compared to men, but this advantage is reduced with age.<sup>25</sup> Estrogen  
235 loss has been suggested to be a major mediator of this effect. Postmenopausal women  
236 become more susceptible to left ventricular diastolic dysfunction, and hormone  
237 replacement therapy mitigates this effect.<sup>26</sup> Ovariectomized mice and rats are similarly  
238 more susceptible to insults to the heart, including pressure overload,<sup>27</sup> AngII induced  
239 hypertrophy,<sup>28</sup> and diabetes-associated myofilament sensitization to calcium.<sup>29,30</sup>  
240 Ovariectomized mice exhibit a faster onset of obesity-driven heart failure, and show  
241 earlier signs of cardiac mitochondrial dysfunction, including elevated ROS production

242 and swelling.<sup>31</sup> Mice lacking estrogen receptors are found to be more sensitive to IR  
243 injury and hypertensive cardiomyopathy.<sup>28,32</sup> Although less well-studied, testosterone  
244 also plays a role in driving sexual dimorphism between male and female individuals.  
245 Since estrogen was sufficient to reproduce an increase in GCN5L1 production, we have  
246 not evaluated the effects of testosterone. However, we cannot discount the possibility of  
247 an effect, and further studies are required to make this determination.

248  
249 In recent years, GPER has taken a central role in our understanding of how estrogen  
250 impacts cardiac function and resiliency.<sup>33</sup> GPER activation in cardiomyocytes lacking  
251 classical ER $\alpha$  and ER $\beta$  receptors was reported to alter intracellular calcium influx.<sup>34</sup> In  
252 addition, GPER activation is associated with protection from ischemia-reperfusion injury,  
253 dependent on PI3K activation.<sup>35</sup> Agonism of GPER with G-1 is reported to protect  
254 estrogen-deficient rats from LV remodeling.<sup>36</sup> G-1 is also reported to inhibit the opening  
255 of the mitochondrial membrane permeability pore (mPTP),<sup>37</sup> and reduces the  
256 upregulation of inflammatory cytokines TNF-alpha, IL-1beta, and IL-6.<sup>38</sup> Our earlier  
257 observation that GCN5L1 protects the heart from I/R injury<sup>17</sup> raises the possibility that  
258 GPER-mediated upregulation of GCN5L1 may be an additional mechanism by which  
259 estrogen protects the heart.

260  
261 The acetylation status of several mitochondria-localized proteins has been reported to  
262 impact their function and stability. A key driver of acetylation status in mitochondria is  
263 the deacetylase SIRT3, which is expressed in myocardial tissue, and has been shown  
264 to regulate the function of several mitochondrial proteins involved in oxidative

265 phosphorylation, membrane integrity, and redox homeostasis (See recent review by  
266 Chen et al.<sup>39</sup>). However, no difference in cardiac SIRT3 expression was identified  
267 between male and female mice, despite altered mitochondrial acetylation levels,  
268 suggesting that dimorphic effects in acetylation are due to GCN5L1 only.  
269  
270 GPER agonism drives translation and production of GCN5L1 protein, but at no time  
271 point after GPER activation was GCN5L1 message elevated. A recent publication by Lv  
272 et al. suggests that GCN5L1 abundance is regulated post-transcriptionally in diabetic  
273 kidney cells.<sup>40</sup> We did not observe evidence that G-1 blocks the degradation of GCN5L1  
274 by the 26S proteasome. Interestingly, there are reports of GCN5L1 acting as a  
275 translational coactivator to ER $\alpha$  in HeLa cells, binding directly to both the receptor and  
276 the corepressor element MTA1.<sup>41</sup> That study did not evaluate a direct interaction  
277 between GCN5L1 and GPER, and although a mechanism by which GCN5L1 might  
278 interact directly with GPER was briefly considered, our immunoprecipitation studies did  
279 not support the direct binding of GPER to GCN5L1 (data not shown).  
280  
281 We demonstrate here that GCN5L1 is required for estrogen and GPER agonism to  
282 upregulate the acetylation and activity of medium-chain acyl-CoA dehydrogenase  
283 (MCAD) in cardiac-derived cells. MCAD is a mitochondria-localized enzyme that  
284 catalyzes the rate-limiting step in the  $\beta$ -oxidation of medium chain fatty acids, the  $\alpha,\beta$ -  
285 dehydrogenation of fatty acyl-CoA. MCAD plays a key role in the progression of  
286 myocardial metabolic dysregulation induced by heart failure. TAC-mediated metabolic  
287 changes include the downregulation of MCAD,<sup>42</sup> and gene delivery of MCAD to the

288 heart protects against pressure overload-induced pathological remodeling.<sup>43</sup> Subjecting  
289 mice to a high-fat diet was reported to increase contractile recovery after MI, concurrent  
290 with an increase in MCAD activity.<sup>44</sup> Our laboratory and others have shown that high-fat  
291 feeding increases the activity of multiple ACADs through increased acetylation in  
292 response to GCN5L1 expression.<sup>12</sup> In addition, MCAD has been reported previously to  
293 be regulated estrogen; E2 has been reported to upregulate or preserve cardiac MCAD  
294 expression via PGC-1.<sup>6-8</sup> Studies of skeletal muscle biopsies report that women  
295 express higher levels of MCAD,<sup>45</sup> and MCAD expression was reported to increase in  
296 men after treatment with E2.<sup>46</sup> The studies reported here show for the first time that  
297 estrogen may also impact through posttranslational acetylation mediated by GCN5L1  
298 expression.

299  
300 In summary, we demonstrate here for the first time that GCN5L1 is upregulated by  
301 estrogen signaling in both mouse and human myocardium, and in cultured  
302 cardiomyocytes. The mechanism of upregulation is identified as GPER-mediated  
303 signaling. MCAD is identified as a target of acetylation and activation in the presence of  
304 E2 or GPER agonists, which is dependent on GCN5L1 expression. These findings shed  
305 new light on the role that posttranslational acetylation, mediated by GCN5L1, may play  
306 in the differences observed between men and women in cardiac metabolism.

307 **ACKNOWLEDGEMENTS**

308

309 This work was supported by NIH/NHLBI R01 (HL132917 & HL147861) research grants

310 to IS, and a UPMC CMRF Research Grant to JRM.



311 **Figure Legends**

312

313 **Figure 1: Mitochondrial protein acetylation and GCN5L1 are upregulated in female**

314 **mice.** A. Immunoblotting of mitochondrial lysate fractions from male and female mice  
315 demonstrate that females exhibit modestly but significantly higher levels of total protein  
316 acetylation. N = 10, B. GCN5L1, but not SIRT3, mRNA is significantly increased in  
317 female hearts relative to males. C. GCN5L1 protein levels are significantly increased in  
318 the myocardium of female mice compared to male mice. N = 10, \* =  $p < 0.05$ , \*\*\* =  $p <$   
319 0.001 vs. male.

320

321 **Figure 2: Estrogen drives GCN5L1 expression via GPER** A. Human tissues from

322 female patients of pre-menopausal (PRE) or post-menopausal (POST) age. B. Human  
323 derived AC16 cells incubated with E2 show an increase in GCN5L1. C. GCN5L1  
324 immunoblotting after incubation for 24 hours with E2 and or the ERa/ERb antagonist ICI  
325 182, 780. N = 4, \* =  $p < 0.05$ , \*\*\*\* =  $p < 0.0001$  vs. vehicle. D. GCN5L1 is elevated after  
326 incubation for 24 hours with E2 and the GPER agonist G-1, and is blocked in the  
327 presence of GPER antagonist G-36. N = 5-6, \* =  $p < 0.05$ , \*\* =  $p < 0.01$  vs. vehicle.

328

329 **Figure 3: Estrogen promotes GCN5L1 translation.** A. Expression of GCN5L1 mRNA

330 levels determined by qPCR after treatment with E2 or G-1. N = 3, \*\* =  $p < 0.01$  vs.  
331 vehicle. B. GCN5L1 levels are significantly elevated by blocking 26S degradation,  
332 suggesting that GPER agonism does not increase GCN5L1 via impaired proteolysis. N

333 = 4, \* =  $p < 0.05$ , \*\*\* =  $p < 0.001$  vs. control. C. GCN5L1 induction is blocked by CHX, a  
334 translation inhibitor. N = 4 \* =  $p < 0.05$ , \*\*\* =  $p < 0.001$  vs. control.

335

336 **Figure 4 : GCN5L1 is required for estrogen-mediated MCAD acetylation and**  
337 **activation.** A. E2 and G-1 raise MCAD activity, while GCN5L1 shRNA knockdown  
338 blocks this effect. N = 8. B. Acetylation of MCAD is significantly reduced in the presence  
339 of E2 and G-1 when GCN5L1 is absent. N = 4 \* =  $p < 0.05$ , \*\* =  $p < 0.01$  vs. control, † =  
340  $p < 0.01$  vs. vehicle. C. Schematic representing the hypothesized mechanism of action  
341 of estrogen on GCN5L1 in cardiomyocytes.

- 342 1. Aryan, L. *et al.* The role of estrogen receptors in cardiovascular disease.  
343 *International Journal of Molecular Sciences* **21**, 1–26 (2020).
- 344 2. Meyer, M. R., Prossnitz, E. R. & Barton, M. The G protein-coupled estrogen  
345 receptor GPER/GPR30 as a regulator of cardiovascular function. *Vascul.*  
346 *Pharmacol.* **55**, 17–25 (2011).
- 347 3. Menazza, S. & Murphy, E. The Expanding Complexity of Estrogen Receptor  
348 Signaling in the Cardiovascular System. *Circ. Res.* **118**, 994–1007 (2016).
- 349 4. Ueda, K., Adachi, Y., Liu, P., Fukuma, N. & Takimoto, E. Regulatory Actions of  
350 Estrogen Receptor Signaling in the Cardiovascular System. *Frontiers in*  
351 *Endocrinology* **10**, 909 (2020).
- 352 5. Mather, K. J. & DeGrado, T. R. Imaging of myocardial fatty acid oxidation.  
353 *Biochim. Biophys. Acta - Mol. Cell Biol. Lipids* **1861**, 1535–1543 (2016).
- 354 6. Schreiber, S. N., Knutti, D., Brogli, K., Uhlmann, T. & Kralli, A. The transcriptional  
355 coactivator PGC-1 regulates the expression and activity of the orphan nuclear  
356 receptor estrogen-related receptor  $\alpha$  (ERR $\alpha$ ). *J. Biol. Chem.* **278**, 9013–9018  
357 (2003).
- 358 7. Hsieh, Y.-C. *et al.* Inhibition of cardiac PGC-1 $\alpha$  expression abolishes ER $\beta$   
359 agonist-mediated cardioprotection following trauma-hemorrhage. *FASEB J.* **20**,  
360 1109–1117 (2006).
- 361 8. Kim, M. S., Shigenaga, J. K., Moser, A. H., Feingold, K. R. & Grunfeld, C.  
362 Suppression of estrogen-related receptor  $\alpha$  and medium-chain acyl-coenzyme A  
363 dehydrogenase in the acute-phase response. *J. Lipid Res.* **46**, 2282–2288 (2005).
- 364 9. Kendrick, A. A. *et al.* Fatty liver is associated with reduced SIRT3 activity and

- 365 mitochondrial protein hyperacetylation. *Biochem. J.* **433**, 505–14 (2011).
- 366 10. Alrob, O. A. *et al.* Obesity-induced lysine acetylation increases cardiac fatty acid  
367 oxidation and impairs insulin signalling. *Cardiovasc. Res.* **103**, 485–97 (2014).
- 368 11. Koentges, C. *et al.* SIRT3 deficiency impairs mitochondrial and contractile  
369 function in the heart. *Basic Res Cardiol* **110**, 36 (2015).
- 370 12. Thapa, D. *et al.* Acetylation of mitochondrial proteins by GCN5L1 promotes  
371 enhanced fatty acid oxidation in the heart. *Am. J. Physiol. Heart Circ. Physiol.*  
372 **313**, H265–H274 (2017).
- 373 13. Manning, J. R. *et al.* Loss of GCN5L1 in cardiac cells disrupts glucose metabolism  
374 and promotes cell death via reduced Akt/mTORC2 signaling. *Biochem. J.* **476**,  
375 1713–1724 (2019).
- 376 14. Thapa, D. *et al.* Adropin regulates pyruvate dehydrogenase in cardiac cells via a  
377 novel GPCR-MAPK-PDK4 signaling pathway. *Redox Biol.* **18**, 25–32 (2018).
- 378 15. Carnevale, I. *et al.* SIRT1-SIRT3 Axis Regulates Cellular Response to Oxidative  
379 Stress and Etoposide. *J. Cell. Physiol.* **232**, 1835–1844 (2017).
- 380 16. Davidson, M. M. *et al.* Novel cell lines derived from adult human ventricular  
381 cardiomyocytes. *J. Mol. Cell. Cardiol.* **39**, 133–147 (2005).
- 382 17. Manning, J. R. *et al.* Cardiac-specific deletion of GCN5L1 restricts recovery from  
383 ischemia-reperfusion injury. *J. Mol. Cell. Cardiol.* **129**, 69–78 (2019).
- 384 18. Robertson, J. F. ICI 182,780 (Fulvestrant)--the first oestrogen receptor down-  
385 regulator--current clinical data. *Br. J. Cancer* **85 Suppl 2**, 11–4 (2001).
- 386 19. Thomas, P., Pang, Y., Filardo, E. J. & Dong, J. Identity of an estrogen membrane  
387 receptor coupled to a G protein in human breast cancer cells. *Endocrinology* **146**,

- 388 624–632 (2005).
- 389 20. Filardo, E. J., Quinn, J. A., Bland, K. I. & Frackelton, J. Estrogen-induced  
390 activation of Erk-1 and Erk-2 requires the G protein-coupled receptor homolog,  
391 GPR30, and occurs via trans-activation of the epidermal growth factor receptor  
392 through release of HB-EGF. *Mol. Endocrinol.* **14**, 1649–1660 (2000).
- 393 21. Scott, I., Webster, B. R., Li, J. H. & Sack, M. N. Identification of a molecular  
394 component of the mitochondrial acetyltransferase programme: a novel role for  
395 GCN5L1. *Biochem. J.* **443**, 655–661 (2012).
- 396 22. Filardo, E. J., Quinn, J. A., Bland, K. I. & Frackelton, J. Estrogen-induced  
397 activation of Erk-1 and Erk-2 requires the G protein-coupled receptor homolog,  
398 GPR30, and occurs via trans-activation of the epidermal growth factor receptor  
399 through release of HB-EGF. *Mol. Endocrinol.* **14**, 1649–1660 (2000).
- 400 23. Prossnitz, E. R. & Barton, M. Signaling, physiological functions and clinical  
401 relevance of the G protein-coupled estrogen receptor GPER. *Prostaglandins and*  
402 *Other Lipid Mediators* **89**, 89–97 (2009).
- 403 24. Thapa, D. *et al.* Cardiomyocyte-specific deletion of GCN5L1 in mice restricts  
404 mitochondrial protein hyperacetylation in response to a high fat diet. *Sci. Rep.* **10**,  
405 (2020).
- 406 25. Cho, L. *et al.* Summary of Updated Recommendations for Primary Prevention of  
407 Cardiovascular Disease in Women: JACC State-of-the-Art Review. *J. Am. Coll.*  
408 *Cardiol.* **75**, 2602–2618 (2020).
- 409 26. Pines, A. *et al.* Menopause-induced changes in doppler-derived parameters of  
410 aortic flow in healthy women. *Am. J. Cardiol.* **69**, 1104–1106 (1992).

- 411 27. Mori, T. *et al.* Enhanced cardiac inflammation and fibrosis in ovariectomized  
412 hypertensive rats: A possible mechanism of diastolic dysfunction in  
413 postmenopausal women. *Hypertens. Res.* **34**, 496–502 (2011).
- 414 28. Pedram, A. *et al.* Estrogen inhibits cardiac hypertrophy: Role of estrogen  
415 receptor- $\beta$  to inhibit calcineurin. *Endocrinology* **149**, 3361–3369 (2008).
- 416 29. Bupha-Intr, T., Laosiripisan, J. & Wattanapermpool, J. Moderate intensity of  
417 regular exercise improves cardiac {SR} {Ca}<sup>2+</sup> uptake activity in ovariectomized  
418 rats. *J. Appl. Physiol.* **107**, 1105–1112 (2009).
- 419 30. Thawornkaiwong, A., Pantharanontaga, J. & Wattanapermpool, J.  
420 Hypersensitivity of myofilament response to Ca<sup>2+</sup> in association with  
421 maladaptation of estrogen-deficient heart under diabetes complication. *Am. J.*  
422 *Physiol. Integr. Comp. Physiol.* **292**, R844–R851 (2007).
- 423 31. Sivasinprasasn, S. *et al.* Obese-insulin resistance accelerates and aggravates  
424 cardiometabolic disorders and cardiac mitochondrial dysfunction in estrogen-  
425 deprived female rats. *Age (Omaha)*. **37**, (2015).
- 426 32. Pelzer, T. *et al.* Increased mortality and aggravation of heart failure in estrogen  
427 receptor- $\beta$  knockout mice after myocardial infarction. *Circulation* **111**, 1492–1498  
428 (2005).
- 429 33. Groban, L. *et al.* Female Heart Health: Is GPER the Missing Link? *Frontiers in*  
430 *Endocrinology* **10**, (2020).
- 431 34. Dennis, M. K. *et al.* Identification of a GPER/GPR30 antagonist with improved  
432 estrogen receptor counterselectivity. *J. Steroid Biochem. Mol. Biol.* **127**, 358–66  
433 (2011).

- 434 35. Deschamps, A. M. & Murphy, E. Activation of a novel estrogen receptor, GPER, is  
435 cardioprotective in male and female rats. *Am. J. Physiol. Heart Circ. Physiol.* **297**,  
436 H1806-13 (2009).
- 437 36. Wang, H. *et al.* G protein-coupled estrogen receptor (GPER) deficiency induces  
438 cardiac remodeling through oxidative stress. *Transl. Res.* **199**, 39–51 (2018).
- 439 37. Bopassa, J. C., Eghbali, M., Toro, L. & Stefani, E. A novel estrogen receptor  
440 GPER inhibits mitochondria permeability transition pore opening and protects the  
441 heart against ischemia-reperfusion injury. *Am. J. Physiol. Heart Circ. Physiol.* **298**,  
442 H16-23 (2010).
- 443 38. Weil, B. R. *et al.* Signaling via GPR30 protects the myocardium from  
444 ischemia/reperfusion injury. *Surgery* **148**, 436–443 (2010).
- 445 39. Chen, J., Chen, S., Zhang, B. & Liu, J. SIRT3 as a potential therapeutic target for  
446 heart failure. *Pharmacological Research* **165**, 105432 (2021).
- 447 40. T, L. *et al.* General Control of Amino Acid Synthesis 5-Like 1-Mediated Acetylation  
448 of Manganese Superoxide Dismutase Regulates Oxidative Stress in Diabetic  
449 Kidney Disease. *Oxid. Med. Cell. Longev.* **2021**, (2021).
- 450 41. Mishra, S. K. *et al.* MICoA, a novel metastasis-associated protein 1 (MTA1)  
451 interacting protein coactivator, regulates estrogen receptor-alpha transactivation  
452 functions. *J. Biol. Chem.* **278**, 19209–19 (2003).
- 453 42. Wu, J. *et al.* Variations in Energy Metabolism Precede Alterations in Cardiac  
454 Structure and Function in Hypertrophic Preconditioning. *Front. Cardiovasc. Med.*  
455 **7**, (2020).
- 456 43. Bernardo, B. C. *et al.* Gene delivery of medium chain acyl-coenzyme A

- 457 dehydrogenase induces physiological cardiac hypertrophy and protects against  
458 pathological remodelling. *Clin. Sci.* **132**, 381–397 (2018).
- 459 44. Rennison, J. H. *et al.* Enhanced acyl-CoA dehydrogenase activity is associated  
460 with improved mitochondrial and contractile function in heart failure. *Cardiovasc.*  
461 *Res.* **79**, 331–340 (2008).
- 462 45. Maher, A. C., Akhtar, M., Vockley, J. & Tarnopolsky, M. A. Women Have Higher  
463 Protein Content of  $\beta$ -Oxidation Enzymes in Skeletal Muscle than Men. *PLoS One*  
464 **5**, e12025 (2010).
- 465 46. Maher, A. C., Akhtar, M. & Tarnopolsky, M. A. Men supplemented with  $17\beta$ -  
466 estradiol have increased  $\beta$ -oxidation capacity in skeletal muscle. *Physiol.*  
467 *Genomics* **42**, 342–347 (2010).
- 468
- 469



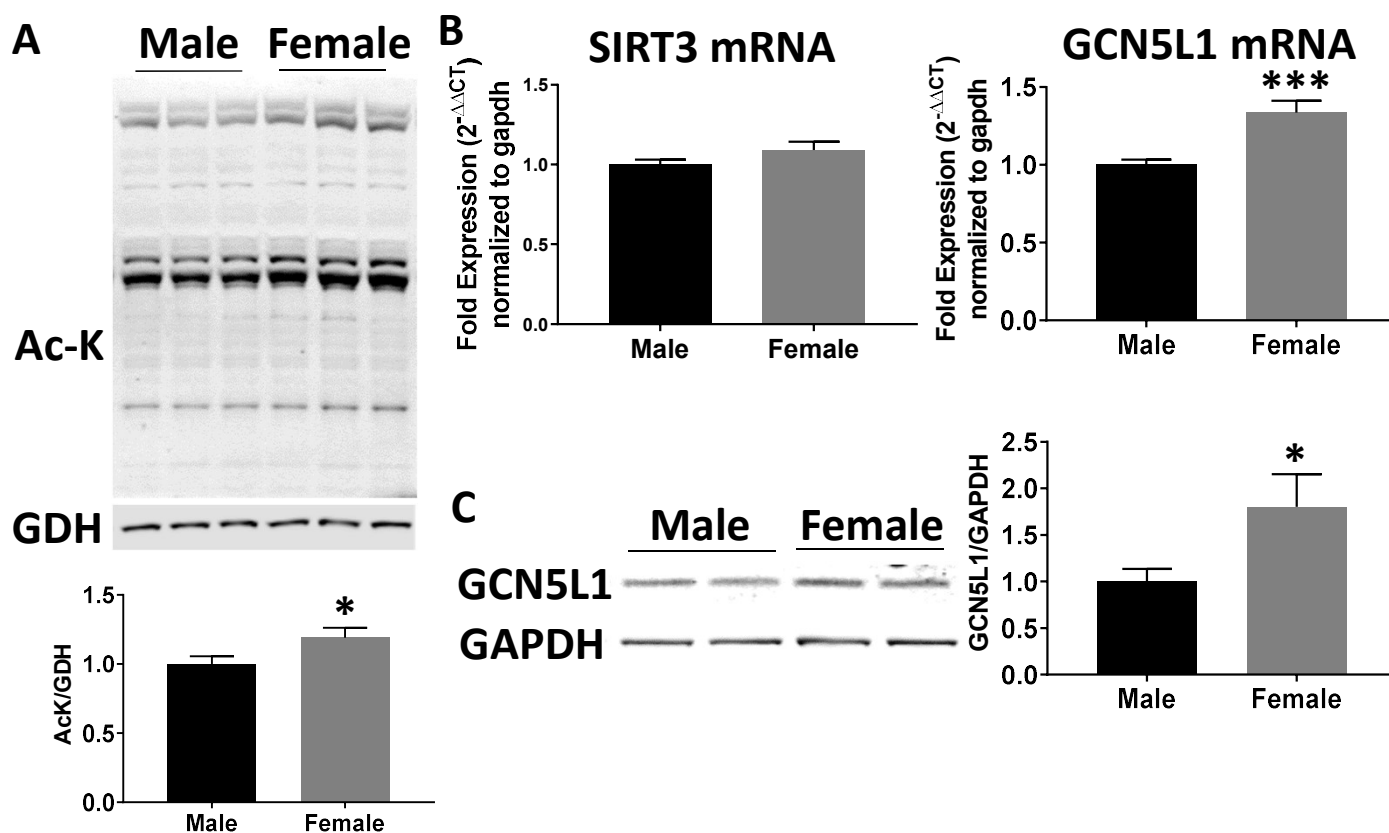

Figure 1: Mitochondrial protein acetylation and GCN5L1 are upregulated in female mice. A. Immunoblotting of mitochondrial lysate fractions from male and female mice demonstrate that females exhibit modestly but significantly higher levels of total protein acetylation. N=10, B. GCN5L1, but not SIRT3, mRNA is significantly increased in female hearts relative to males. C. GCN5L1 protein levels are significantly increased in the myocardium of female mice compared to male mice. N=10, \* $p < 0.05$ , \*\*\* $p < 0.001$  vs. male

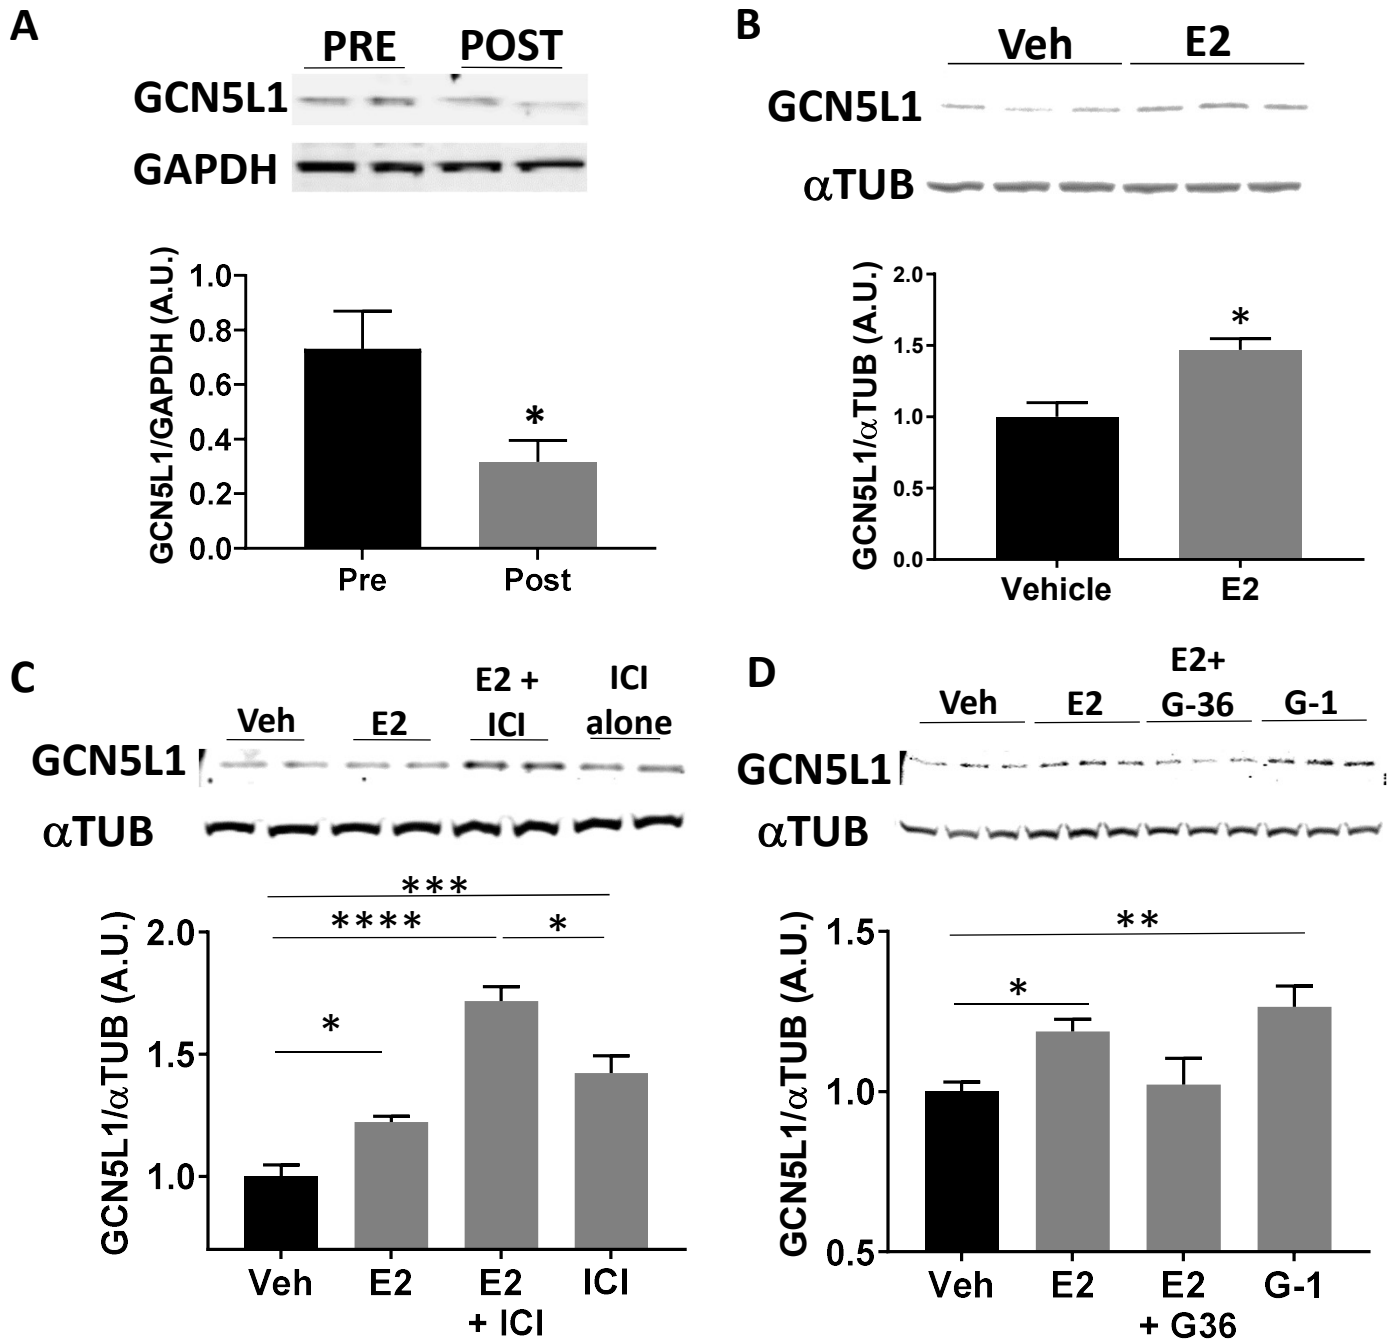

Figure 2: Estrogen drives GCN5L1 expression via GPER A. Human tissues from female patients of pre-menopausal (PRE) or post-menopausal (POST) age. B. Human derived AC16 cells incubated with E2 show an increase in GCN5L1. GCN5L1 is not upregulated through canonical ER agonism. GCN5L1 immunoblotting after incubation for 24 hours with E2 and or the ER $\alpha$ /ER $\beta$  antagonist ICI 182, 780. N=4, \* $p$ <0.05, \*\*\*\* $p$ <0.0001 vs. vehicle. D. GCN5L1 is elevated after incubation for 24 hours with E2 and the GPER agonist G-1, and is blocked in the presence of GPER antagonist G-36. N=5-6, \* $p$ <0.05, \*\* $p$ <0.01 vs. vehicle.

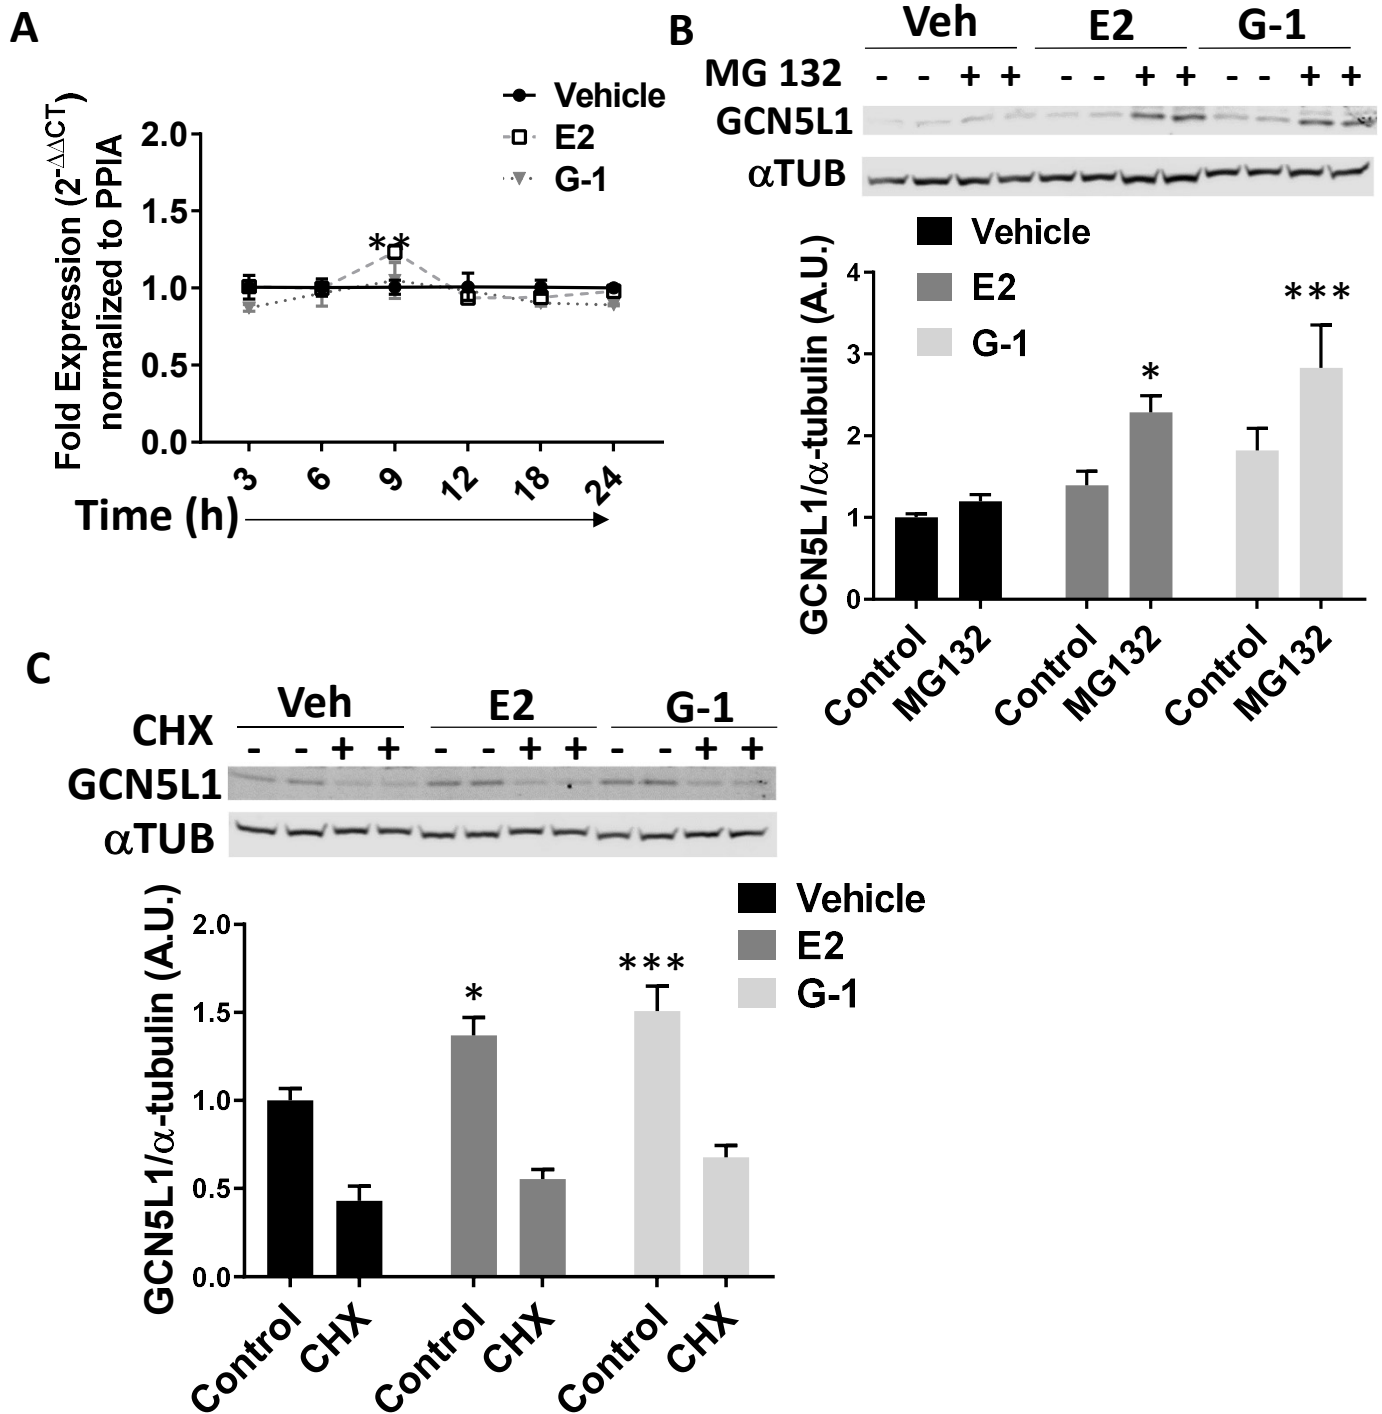

Figure 3: Estrogen promotes GCN5L1 translation. A. expression of GCN5L1 mRNA levels determined by qPCR after treatment with E2 or G-1. N=3 \*\*p<0.01 vs. vehicle. B. GCN5L1 levels are significantly elevated by blocking 26S degradation, suggesting that GPER agonism does not increase GCN5L1 via impaired proteolysis. N=4, \*p<0.05, \*\*\*p<0.001 vs. control. C. GCN5L1 induction is blocked by CHX, a translation inhibitor. N=4 \*p<0.05, \*\*\*p<0.001 vs. control.

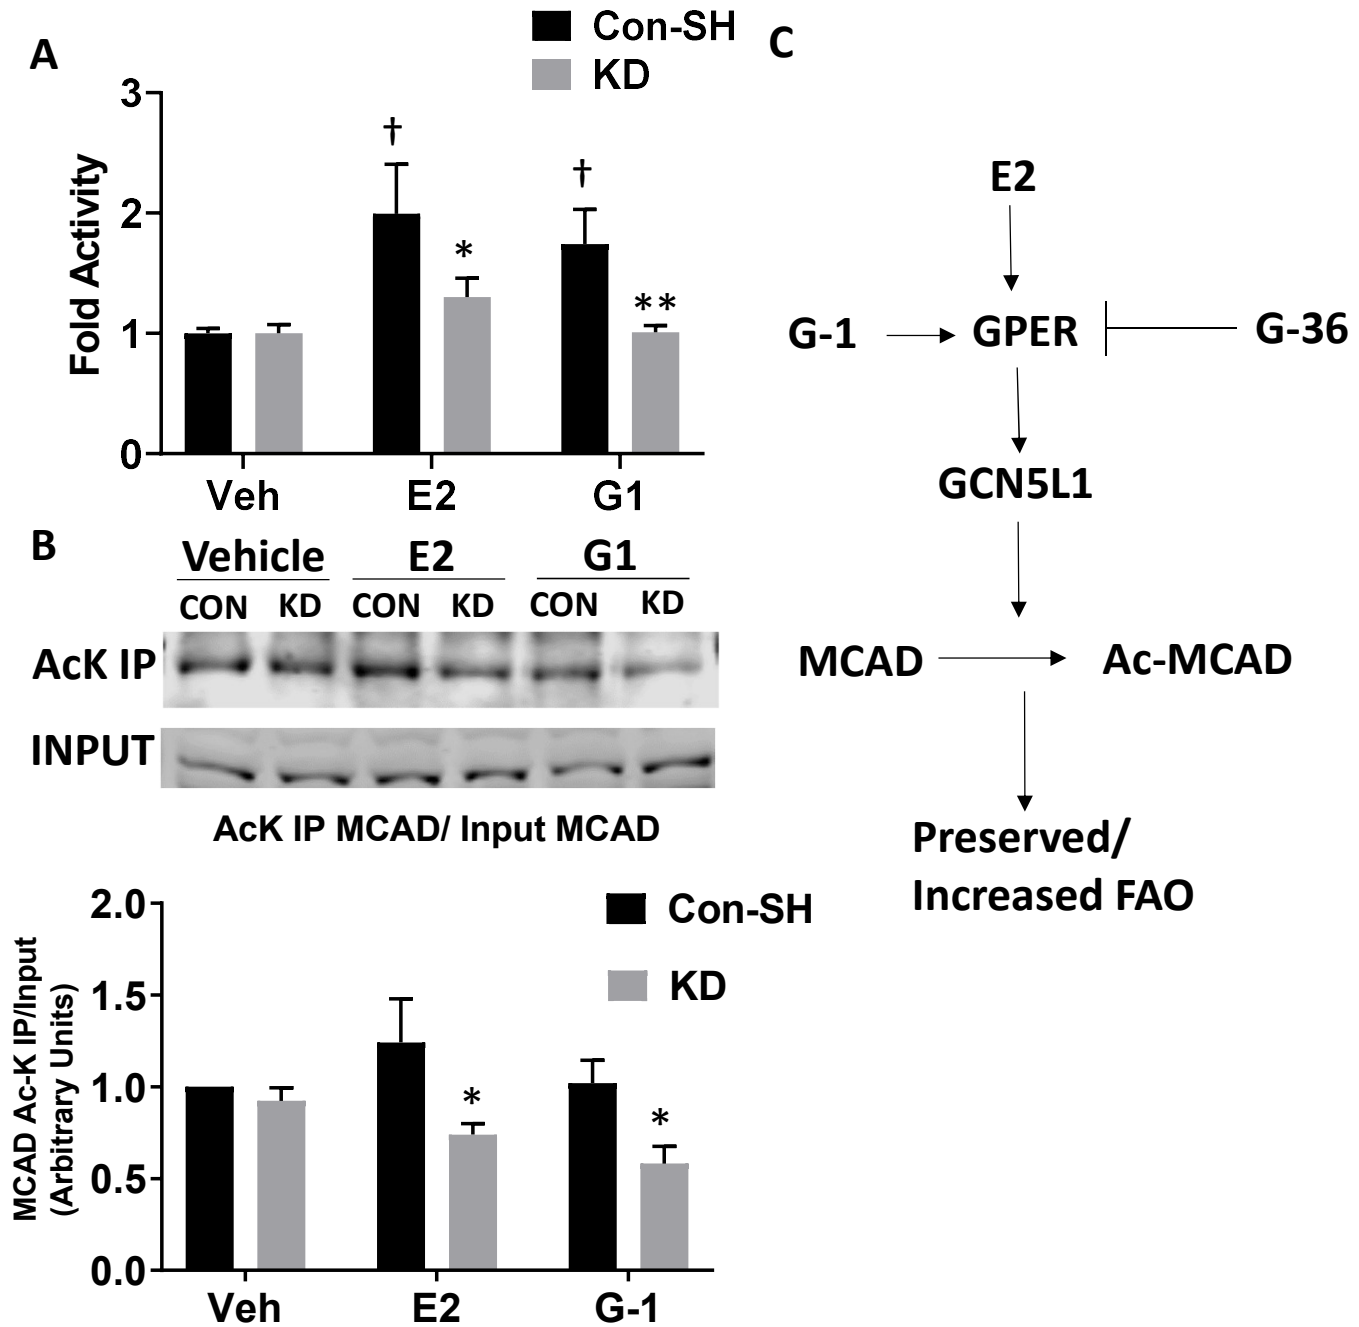

Figure 4: GCN5L1 is required for estrogen-mediated MCAD acetylation and activation A. E2 and G-1 raise MCAD activity, while loss of GCN5L1 blocks this effect. N=8 B. Acetylation of MCAD is significantly reduced in the presence of E2 and G-1 when GCN5L1 is absent. N=4 \*p<0.05, \*\*p<0.01 vs. control, †p<0.01 vs. vehicle. C. Schematic representing the hypothesized mechanism of action of estrogen on GCN5L1 in cardiomyocytes
